# Supplementary material for: An Updated Systematic Review and Meta-Analysis of the Association between the De Ritis Ratio and Disease Severity and Mortality in Patients with COVID-19
Source: MDPI journal article supplement (doi:10.3390/life13061324), 2023-06-05
Supplement: s1 [file s1]

**Supplementary Table 3.** Studies reporting the De Ritis ratio in COVID-19 patients with different disease severity and survival status.

| First author, year, country             | Non-severe disease or survivor |                |                 |                             | Severe disease or non-survivor |                |                 |                              | Outcome       |
|-----------------------------------------|--------------------------------|----------------|-----------------|-----------------------------|--------------------------------|----------------|-----------------|------------------------------|---------------|
|                                         | N                              | Age<br>(Years) | Gender<br>(M/F) | De Ritis ratio<br>(Mean±SD) | N                              | Age<br>(Years) | Gender<br>(M/F) | De Ritis ratio<br>(Mean ±SD) |               |
| Davidov-Derevyanko Y, 2020, Israel (21) | 297                            | 55.8           | 181/116         | 1.32±0.53                   | 32                             | 75.5           | 19/13           | 1.94±0.87                    | Mortality     |
| Fu L, 2020, China (44)                  | 211                            | NR             | NR              | 1.27±0.59                   | 139                            | NR             | NR              | 1.47±0.67                    | Severity      |
| Paliogiannis P, 2020, Italy (22)        | 21                             | NR             | NR              | 1.27±0.44                   | 9                              | NR             | NR              | 2.0±0.79                     | Mortality     |
| An YW, 2021, China (36)                 | 195                            | 41.9           | 78/117          | 1.3±0.8                     | 58                             | 56.8           | 35/23           | 1.3±0.8                      | Severity      |
| Benedé-Ubieto R, 2021, Spain (39)       | 659                            | NR             | NR              | 1.33±0.04                   | 140                            | NR             | NR              | 1.8±0.07                     | Mortality     |
| Chen F, 2021, China (40)                | 657                            | 46             | 271/386         | 1.08±0.6                    | 173                            | 69             | 107/66          | 1.31±0.84                    | Severity      |
| Mittal A, 2021, Nepal (48)              | 92                             | 35             | 54/38           | 1.2±0.44                    | 8                              | 64             | 6/2             | 1.6±0.74                     | Severity      |
| Moorthy S, 2021, India (49)             | 390                            | 50             | 233/157         | 1.72±2.34                   | 66                             | 61             | 44/22           | 1.26±1.41                    | Severity      |
| Ni YN, 2021, China (50)                 | 307                            | 40             | 135/172         | 1.01±0.41                   | 526                            | 48             | 265/261         | 1.05±0.45                    | Severity      |
| Ramos-Lopez O, 2021, Mexico (51)        | 1,645                          | 64             | 968/677         | 1.32±0.66                   | 449                            | 76             | 301/148         | 1.74±0.76                    | Mortality/ICU |
| Zinellu A, 2021, Italy (25)             | 77                             | 80             | 27/50           | 1.27±0.54                   | 28                             | 68             | 8/20            | 1.67±0.44                    | Mortality     |
| Aziz F, 2022, Austria (37)              | 605                            | 68             | 423/182         | 1.28±0.52                   | 142                            | 79             | 95/47           | 1.67±0.74                    | Mortality     |
| Baik SM, 2022, Korea (38)               | 154                            | 65             | 74/80           | 1.6±0.92                    | 49                             | 76             | 24/25           | 2.35±1.27                    | Mortality     |
| Crisan D, 2022, Romania (41)            | 327                            | 62             | 190/137         | 1.2±0.05                    | 43                             | 73             | 30/13           | 1.83±0.28                    | Mortality     |
| Dracz B, 2022, Hungary (43)             | 286                            | 63             | NR              | 1.0±0.39                    | 36                             | 79             | NR              | 1.8±0.85                     | Mortality     |

Legend: M, male; F, female; SD, standard deviation; ICU, intensive care unit; NR, not reported.
