# Supplementary material for: An Updated Systematic Review and Meta-Analysis of the Association between the De Ritis Ratio and Disease Severity and Mortality in Patients with COVID-19
Source: MDPI journal article supplement (doi:10.3390/life13061324), 2023-06-05
Supplement: s1 [file s1]

**Supplementary Table 5.** Studies reporting the association between the De Ritis ratio and disease severity and survival status in COVID-19 patients using odds ratios.

| <b>First author, year, country</b> | <b>Study design</b> | <b>N</b> | <b>Age (Years)</b> | <b>Gender (M/F)</b> | <b>OR</b> | <b>(95% CI)</b> | <b>Outcome</b>        |
|------------------------------------|---------------------|----------|--------------------|---------------------|-----------|-----------------|-----------------------|
| Qin C, 2020, China (23)            | R                   | 567      | 55                 | 247/320             | 99.9      | 2.1-480.5       | Mortality             |
| Goel H, 2021, USA (46)             | R                   | 551      | 64                 | 299/252             | 2.049     | 1.273-3.3       | Mortality             |
| Liu Z, 2021, China (24)            | R                   | 1,788    | 59                 | 826/913             | 2.055     | 1.269-3.327     | Severity              |
| Wong GLH, 2021, China (52)         | R                   | 7,622    | 47                 | 3,675/3,947         | 1.017     | 0.616-1.418     | Persistent positivity |
| Yadlapati S, 2021, USA (54)        | R                   | 200      | 67                 | 110/90              | 2.678     | 1.202-5.963     | Intubation            |
| Aziz F, 2022, Austria (37)         | R                   | 747      | 70                 | 518/229             | 1.89      | 1.19-3.01       | Mortality             |
| Crisan D, 2022, Romania (41)       | R                   | 370      | 66                 | 220/150             | 1.46      | 0.71-2.21       | Mortality             |
| Dracz B, 2022, Hungary (43)        | R                   | 322      | 66                 | 178/144             | 29.967    | 5.266-170.514   | Mortality             |
| Wu S (a), 2022, USA (53)           | R                   | 2,146    | 57                 | 944/1,119           | 1.52      | 1.22-1.9        | Length of stay        |
| Wu S (b), 2022, USA (53)           | R                   | 2,146    | 57                 | 944/1,119           | 1.6       | 1.14-2.26       | ICU transfer          |
| Wu S (c), 2022, USA (53)           | R                   | 2,146    | 57                 | 944/1,119           | 1.55      | 0.75-3.19       | Mortality             |

Legend: M, male; F, female; OR, odds ratio; CI, confidence interval; ICU, intensive care unit; R, retrospective.
