# Supplementary material for: An Updated Systematic Review and Meta-Analysis of the Association between the De Ritis Ratio and Disease Severity and Mortality in Patients with COVID-19
Source: MDPI journal article supplement (doi:10.3390/life13061324), 2023-06-05
Supplement: s1 [file s1]

**Supplementary Table 4.** The Joanna Briggs Institute critical appraisal checklist.

[illegible]
