# Supplementary material for: An Updated Systematic Review and Meta-Analysis of the Association between the De Ritis Ratio and Disease Severity and Mortality in Patients with COVID-19
Source: MDPI journal article supplement (doi:10.3390/life13061324), 2023-06-05
Supplement: s1 [file s1]

**Supplementary Table 7.** Studies investigating the accuracy of the De Ritis ratio for disease severity or survival status in COVID-19 patients.

| First author, year, country              | Study design | N   | AUC (95% CI)        | Cut-off | Sensitivity | Specificity | Outcome   |
|------------------------------------------|--------------|-----|---------------------|---------|-------------|-------------|-----------|
| Medetalibeyoglu A (a), 2020, Turkey (47) | R            | 554 | 0.713 (0.618-0.807) | 1.65    | 0.575       | 0.823       | Mortality |
| Medetalibeyoglu A (b), 2020, Turkey (47) | R            | 554 | 0.636 (0.564-0.709) | 1.26    | 0.649       | 0.604       | ICU       |
| Medetalibeyoglu A (c), 2020, Turkey (47) | R            | 554 | 0.577 (0.529-0.625) | 1.55    | 0.61        | 0.556       | Severity  |
| Qin C, 2020, China (23)                  | R            | 567 | 0.71 (0.67-0.74)    | 1.38    | NR          | NR          | Mortality |
| Moorthy S, 2021, India (49)              | R            | 456 | 0.51 (0.42-0.69)    | NR      | NR          | NR          | Severity  |
| Zinellu A, 2021, Italy (25)              | R            | 105 | 0.701 (0.603-0.787) | 1.49    | 0.74        | 0.60        | Mortality |
| Domjanovic J, 2022, Croatia (42)         | R            | 65  | 0.691 (0.537-0.845) | 1.48    | 0.58        | 0.72        | Mortality |
| Dracz B, 2022, Hungary (43)              | R            | 322 | 0.85 (0.777-0.923)  | 1.218   | 0.72        | 0.75        | Mortality |

Legend: AUC, area under the curve; ICU, intensive care unit; NR, not reported; R, retrospective.
