# Supplementary material for: An Updated Systematic Review and Meta-Analysis of the Association between the De Ritis Ratio and Disease Severity and Mortality in Patients with COVID-19
Source: MDPI journal article supplement (doi:10.3390/life13061324), 2023-06-05
Supplement: s1 [file s1]

## **Supplementary material**

**Supplementary Table 1.** PRISMA 2020 for abstracts checklist.

**Supplementary Table 2.** PRISMA 2020 checklist.

**Supplementary Table 3.** Studies reporting the De Ritis ratio in COVID-19 patients with different disease severity and survival status.

**Supplementary Table 4.** The Joanna Briggs Institute critical appraisal checklist.

**Supplementary Table 5.** Studies reporting the association between the De Ritis ratio and disease severity and survival status in COVID-19 patients using odds ratios.

**Supplementary Table 6.** Studies reporting the association between the De Ritis ratio and disease severity and survival status in COVID-19 patients using hazard ratios.

**Supplementary Table 7.** Studies investigating the accuracy of the De Ritis ratio for disease severity or survival status in COVID-19 patients.

**Supplementary Figure 1.** Funnel plot of studies investigating disease severity and survival status after “trimming-and-filling”. Dummy studies and genuine studies are represented by enclosed circles and free circles, respectively.

**Supplementary Figure 2.** Forest plot of studies examining the De Ritis ratio in patients with COVID-19 according to disease severity or survival status.

**Supplementary Figure 3.** Forest plot of studies examining the De Ritis ratio in patients with COVID-19 according to geographical area.

**Supplementary Figure 4.** Funnel plot of studies investigating the association between the De Ritis ratio and clinical outcomes by means of OR, after “trimming-and-filling”. Dummy studies and genuine studies are represented by enclosed circles and free circles, respectively.

**Supplementary Figure 5.** Forest plot of studies examining the association between the Ritis ratio and clinical outcomes by means of OR, according to measures of disease severity or mortality.

**Supplementary Figure 6.** Forest plot of studies examining the association between the De Ritis ratio and clinical outcomes by means of OR, according to geographical area.

**Supplementary Figure 7.** Forest plot of studies investigating the prognostic accuracy of the De Ritis ratio according to measures of disease severity or survival status.
