# Supplementary material for: An Updated Systematic Review and Meta-Analysis of the Association between the De Ritis Ratio and Disease Severity and Mortality in Patients with COVID-19
Source: MDPI journal article supplement (doi:10.3390/life13061324), 2023-06-05
Supplement: s1 [file s1]

**Supplementary Table 6.** Studies reporting the association between the De Ritis ratio and disease severity and survival status in COVID-19 patients using hazard ratios.

| <b>First author, year, country</b>     | <b>Study design</b> | <b>N</b> | <b>Age (Years)</b> | <b>Gender (M/F)</b> | <b>OR</b> | <b>(95% CI)</b> | <b>Outcome</b> |
|----------------------------------------|---------------------|----------|--------------------|---------------------|-----------|-----------------|----------------|
| Davidov-Derevynko Y, 2020, Israel (21) | R                   | 324      | 59                 | 232/92              | 2.95      | 1.4-6.15        | Mortality      |
| Liu Z, 2021, China (24)                | R                   | 1,788    | 59                 | 913/826             | 3.348     | 1.57-7.139      | Mortality      |
| Zinellu A, 2021, Italy (25)            | R                   | 105      | 72                 | 35/70               | 2.46      | 1.05-5.73       | Mortality      |
| Domjanovic J, 2022, Croatia (42)       | R                   | 65       | 57                 | 22/43               | 3.83      | 1.57-9.35       | Mortality      |
| Fu Y, 2022, China (45)                 | R                   | 4,371    | 64                 | NR                  | 1.04      | 1.01-1.07       | Mortality      |

Legend: M, male; F, female; NR, not reported; OR, odds ratio; CI, confidence interval; R, retrospective.
